# Supplementary material
Source: HighWire-hosted journal article supplement (https://ez-admanager.com/highwire/filestream/156266/field_highwire_adjunct_files/0/sanders_1951.pdf)
Supplement: sanders_1951.pdf [file sanders_1951.pdf]

# Mejoría de la calidad en neurología

## Actualización de las medidas de calidad en el manejo de la demencia

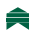

Amy E. Sanders, MD,  
MS  
James Nininger, MD  
John Absher, MD  
Amy Bennett, JD  
Samantha Shugarman,  
MS  
Robert Roca, MD, MPH,  
MBA

Correspondencia y solicitud de  
separatas a A. Bennett:  
quality@aan.com

La demencia es una condición neurológica manifestada por un deterioro sustancial en múltiples habilidades cognitivas que, en conjunto, llevan a una persona a ser incapaz de funcionar en los niveles esperados y progresivamente impide la habilidad independiente de hacer las actividades de todos los días. Durante décadas, los oficiales de salud pública han advertido sobre la llegada de un tsunami de enfermedad de Alzheimer (EA), e incluso se ha caracterizado a la demencia como un flagelo dominante de los tiempos modernos, reemplazando al cáncer.<sup>1</sup> Recientemente, han aparecido signos esperanzadores, que incluyen reportes de algunos estudios de investigación longitudinales que dicen que la incidencia de la demencia está disminuyendo,<sup>2</sup> y desde el gobierno federal, que los fondos para investigación en EA y otras demencias llegarán al billón de dólares en 2017.<sup>3</sup>

La consecuencia natural de la demencia no puede ser subestimada. Aunque frecuentemente no se conceptualiza como tal, la demencia es una enfermedad terminal.<sup>4,5</sup> De acuerdo con las estadísticas anuales de 2015 disponibles desde la Asociación de Alzheimer, 1 de cada 9 americanos de 65 años o más tiene EA, y 1 de cada 3 adultos mayores que mueren en un año han sido diagnosticados con EA u otra demencia.<sup>6</sup> Se estima que el 14,7% de las personas mayores de 70 años en los Estados Unidos tiene demencia.<sup>7</sup> La EA está oficialmente sexta en la lista de causas de muerte en los Estados Unidos.<sup>6</sup> Más aún, el costo monetario de la demencia en los Estados Unidos va de los \$159 a los \$215 billones anualmente,<sup>7</sup>

haciéndola más costosa que la enfermedad cardíaca o el cáncer. En el 2014, cuidadores no pagos le dieron 18 billones de horas de cuidado a personas con demencia, frecuentemente con costos no triviales para su propia salud o bienestar.<sup>8</sup>

Luego del *National Alzheimer's Project Act* de 2011, un Consejo Asesor para Investigación, Cuidado y Servicios en Alzheimer acordaron aconsejar al *Department of Health and Human Services*; el Plan Nacional que produjo en 2012 incluyó un llamado importante para tomar medidas de calidad en el cuidado de pacientes con demencia. La medición de la calidad en prácticas de cuidado y servicios para pacientes con demencia y sus cuidadores continúa siendo una parte integral del trabajo del Consejo Asesor en 2016.<sup>9</sup>

La primera parte de las medidas de calidad del manejo de la demencia fue desarrollada y publicada en 2013 por el modelo de desarrollo de medidas de desempeño de la *American Academy of Neurology* (AAN) bajo el *Physician Consortium for Performance Improvement* (PCPI) de la *American Medical Association* (AMA).<sup>10</sup> Previamente acordado por la AMA, la fundación del PCPI es ahora una fundación independiente que comprende múltiples organizaciones que se enfocan en los avances de la ciencia medida, la mejoría en la calidad y los registros clínicos. Los Centros de Medicare y Medicaid (CMS) incorporaron medidas selectas al *Physician Quality Reporting System* (PQRS), en ese momento el programa principal de reportes de calidad a través del cual los profesionales elegidos y las prácticas de grupo repor-

### GLOSARIO

**AAN** = American Academy of Neurology; **AMA** = American Medical Association; **APA** = American Psychiatric Association; **CMS** = Centers for Medicare and Medicaid Services; **DCL** = deterioro cognitivo leve; **DSM-5** = *Diagnostic and Statistical Manual of Mental Disorders, 5th edition* (Manual Diagnóstico y Estadístico de Trastornos Mentales, 5ta edición); **EA** = enfermedad de Alzheimer; **MIPS** = *Merit-based Incentive Payment System* (Sistema de Pago con Incentivo en base al mérito); **NQF** = *National Quality Forum* (Foro Nacional de Calidad); **PCPI** = *Physician Consortium for Performance Improvement* (Consortio de Médicos para la Mejoría del Desempeño); **PQRS** = *Physician Quality Reporting System* (Sistema de Reporte de Calidad Médica); **SCP** = síntomas conductuales y psiquiátricos.

Del Department of Neurology (A.E.S.), SUNY Upstate Medical University, Syracuse; Department of Psychiatry (J.N.), Weill/Cornell Medical College, New York, NY; Absher Neurology, PA (J.A.); Alliance for Neuro Research, LLC (J.A.); University of South Carolina School of Medicine (J.A.), Greenville; Via College of Osteopathic Medicine (J.A.), Spartanburg, SC; American Academy of Neurology (A.B.), Minneapolis, MN; American Psychiatric Association (S.S.), Arlington, VA; Sheppard Pratt Health System (R.R.), Towson; Department of Psychiatry (R.R.), University of Maryland School of Medicine; and Department of Psychiatry (R.R.), Johns Hopkins University School of Medicine, Baltimore, MD.

Este artículo especial es publicado simultáneamente en *The American Journal of Psychiatry and Neurology*®.

Aprobado por el AAN Quality and Safety Subcommittee el 7 de abril de 2016; AAN Practice Committee el 5 de mayo de 2016; y AANI Board of Directors el 26 de julio de 2016. Aprobado por el APA Performance Measurement Committee el 25 de mayo de 2016; APA Council on Geriatric Psychiatry y APA Council on Quality Care el 6 de julio de 2016; y APA Executive Committee of Board of Trustees el 28 de julio de 2016.

Ir a [Neurology.org](http://Neurology.org) para declaraciones de intereses completas. La información sobre fondos y aquellas declaraciones relevantes para los autores, si existiesen, se encuentran al final del artículo.

taban información sobre la calidad del cuidado dado a sus pacientes con Medicare. Las medidas pueden ser incorporadas al *Merit-based Incentive Payment System* (MIPS) del CMS, que reemplazó al PQRS en 2017.

En 2014, la AAN y la *American Psychiatric Association* (APA) asumieron la administración conjunta del grupo de medidas del manejo de la demencia, con excepción de la medida de Evaluación Cognitiva, para la cual el PCPI mantuvo la administración. En 2015, la AAN y la APA formaron un grupo de trabajo multidisciplinario para mejorar el manejo original de las mediciones de calidad de la demencia e identificar oportunidades de definir nuevas medidas de calidad para dar el mejor cuidado posible a los pacientes con demencia. El grupo de trabajo partió del entendimiento que la demencia es un síndrome más que una enfermedad. En esto, y también a través del grupo de mediciones de referencia, la demencia es utilizada como un paraguas que abarca las numerosas enfermedades y trastornos que causan síntomas de deterioro cognitivo y funcional, constituyendo el síndrome demencial. Esta actualización aplica a pacientes en los cuales el síndrome demencial y el trastorno subyacente han sido identificados a través de una evaluación diagnóstica rigurosa. Son importantes y se necesitan de forma urgente medidas de calidad para el enfoque del diagnóstico de demencia y para la caracterización de los estados prodrómicos como el deterioro cognitivo leve (DCL), pero dichas medidas están por fuera del espectro de este grupo de mediciones.

**OPORTUNIDADES DE MEJORAR** Dar servicios de cuidado de la salud a pacientes con demencia supone un desafío único. Un prerrequisito clave para el desarrollo de una medida es la confirmación de que el desempeño del proveedor todavía no es ideal, y da lugar a mejorar continuamente. Un único conjunto de mediciones no puede captar todos los aspectos del cuidado de pacientes con demencia y sus cuidadores. Esta actualización se enfoca en elementos temáticos claves para el cuidado de pacientes con demencia, más allá de la enfermedad subyacente. La medida original de *screening* cognitivo no estuvo disponible para su actualización por el grupo de trabajo. Esto de ninguna manera debe ser interpretado como una reducción de la importancia de una evaluación cognitiva anual, que continúa siendo el componente esencial del manejo del cuidado de calidad en la demencia. De hecho, el PCPI optó por retener la administración de la medida de evaluación cognitiva, dada su importancia en el espectro de mediciones. Como tal, el PCPI asegurará que la medida continúe siendo clínicamente relevante y consistente con la evidencia más actual, y que

las especificaciones adhieran a los estándares actuales de la industria. La medida fue recientemente aprobada para el uso en ensayos por el *National Quality Forum* (NQF), y el PCPI continuará buscando datos de prueba para facilitar una eventual aprobación completa por el NQF.<sup>11</sup>

El grupo de trabajo desarrollará medidas para abordar 9 áreas o procesos en los cuales se podría mejorar la calidad de cuidado.

**Revelación del diagnóstico.** En este escenario, la revelación se refiere tanto al diagnóstico de demencia como a una explicación de la enfermedad específica como causa más probable de la demencia, identificada a través de la evaluación diagnóstica previa. El diagnóstico de EA, la enfermedad que más comúnmente causa demencia, es dado a los pacientes o sus cuidadores menos del 50% de las veces.<sup>6</sup> Ocultar el diagnóstico de demencia y su enfermedad específica subyacente pone en una injusta desventaja a muchos pacientes y sus familias en el acceso a los servicios disponibles y en obtener asistencia para planear el futuro.

**Educación y apoyo a los cuidadores.** Las personas con demencia van siendo de a poco muy dependientes de terceros, particularmente a medida que el funcionamiento cognitivo empeora y aparecen los síntomas conductuales. Ya sea que dependa de un solo individuo, o que sea compartido por varios miembros de la comunidad de la persona con demencia, el rol del cuidador puede ser extremadamente estresante y tener un costo para la salud general y mental.<sup>12</sup> Los clínicos tienen conocimiento de métodos y recursos para asistir a los cuidadores, y compartir este conocimiento es un aspecto esencial de ofrecer un buen cuidado clínico.

**Evaluación funcional.** En la práctica de rutina, las personas con demencia pueden no ser evaluadas regularmente para notar cambios en su habilidad para realizar actividades tanto básicas como instrumentales de la vida diaria.<sup>13</sup> Las evaluaciones frecuentes y completas permiten a los trabajadores de la salud encontrar estos cambios y hacer intervenciones a tiempo para apoyar la función y mitigar la discapacidad.

**Screening de síntomas conductuales y psiquiátricos.** Los síntomas conductuales y psiquiátricos, incluyendo la depresión, son comunes en la demencia, son fuente mayor de discapacidad y estrés, y frecuentemente no son ni detectados ni bien tratados.<sup>14,15</sup> La búsqueda regular de estos síntomas y su manejo mejorarán la calidad de vida de los pacientes y reducirán la carga de los cuidadores.

**Screening de problemas de seguridad.** La búsqueda de problemas de seguridad es una necesidad mayor y no satisfecha en los pacientes con demencia.<sup>13</sup> Las injurias asociadas con caídas, accidentes y agresión tienen un efecto adverso serio en la calidad de vida de los pacientes y sus cuidadores. Es posible reducir el riesgo de estas consecuencias a través de medidas preventivas simples. Las oportunidades de introducir estas medidas preventivas pueden ser ignoradas si los trabajadores de la salud no buscan los riesgos, prestando especial atención a los dominios de riesgo discretos.

**Screening de la seguridad para conducir.** El inicio de la demencia frecuentemente se relaciona con un deterioro en la capacidad de conducir y aumenta el riesgo de accidentes.<sup>16</sup> Los trabajadores de la salud son frecuentemente reacios a sacar el tema de la seguridad en el manejo, porque se sienten incompetentes para evaluarla y porque los pacientes frecuentemente se resisten a tener estas discusiones.<sup>17</sup> El *screening* sobre la seguridad para conducir a intervalos regulares identificará déficits potenciales y creará oportunidades de revisar opciones razonables para permanecer móviles en la comunidad.

**Planeamiento de cuidados avanzados.** Hay evidencia creciente que indica que los pacientes quieren estar involucrados en el planeamiento de los cuidados avanzados para asegurarse que sus deseos del final de su vida se cumplan,<sup>18</sup> pero pocos pacientes con demencia se involucran en estas discusiones.<sup>17</sup> Las personas con demencia sin directivas anticipadas se enfrentan a riesgos crecientes de una difícil transición al final de su vida.<sup>19</sup>

**Screening de dolor.** El dolor es frecuentemente no reconocido, no tratado y pobremente manejado en pacientes ancianos, particularmente en aquellos con demencia.<sup>20</sup>

**Tratamiento de la demencia.** El tratamiento farmacológico de la demencia según las guías solo ocurre en un tercio de las prácticas de atención primaria.<sup>15</sup>

**MÉTODOS** La AAN y la APA formaron el grupo de trabajo con el propósito de actualizar y modificar el conjunto de medidas de calidad del manejo de demencia original, utilizando el proceso de desarrollo de medidas de la AAN. Los detalles del proceso de desarrollo de medidas completo están disponibles en internet.<sup>21</sup> El equipo líder de la AAN y la APA buscó una representación amplia de los principales interesados. Los miembros fueron seleccionados a través de un proceso competitivo por el equipo líder evaluando la experiencia relevante y sustancial en mediciones de calidad, cuidado de la demencia, o ambos. El grupo de trabajo seleccionado incluyó 26 miembros de 21 organizaciones (hay una lista de los miembros y las organizaciones contribuyentes al final del artículo), e incluían

representantes de médicos, pacientes, cuidadores, trabajadores de práctica avanzada, psicólogos, financiadores y enfermeros. Las opiniones dadas por los representantes de los pacientes y cuidadores probaron ser invaluable. Todos los miembros comunicaron potenciales conflictos de interés y fueron instruidos para abstenerse de votar si el conflicto de interés podía interferir.

La prioridad general del grupo de trabajo fue conceptualizar el mejor cuidado posible para pacientes con demencia y sus cuidadores, y hacer operativos los procesos óptimos para ofrecer dicho cuidado. Para que una medida propuesta avance, la misma medida era revisada y editada antes de la votación para que sea aprobada, rechazada o sea abstenido. Las medidas fueron refinadas a través de un proceso iterativo y consensuado, antes, durante y después de la reunión presencial. En esta construcción global, se le dio gran prioridad a la factibilidad y utilidad de la medida, con el objetivo de minimizar las cargas reportadas. Durante este proceso, el grupo de trabajo también revisó cada una de las medidas originales, evaluando si la evidencia actual continuaba apoyándolas, si seguía habiendo vacíos en el cuidado y si se habían descrito como caminos hacia los objetivos deseados. Este grupo de medición había sido aprobado por el grupo de trabajo, el *Quality and Safety Subcommittee* de la AAN, el *Practice Committee* de la AAN, el *Institute Board of Directors* de la AAN, el *Performance Measurement Committee* de la APA, el *Council on Geriatric Psychiatry* de la APA, el *Council on Quality Care* de la APA, el *Joint Reference Committee* de la APA y el *Board of Trustees* de la APA.

El apéndice e-1 en Neurology.org aporta más información sobre el proceso de desarrollo de medidas y de la evidencia utilizada para estas medidas. Además, las especificaciones de las medidas individuales están incluidas con un numerador, denominador, excepciones y marco de tiempo para la medida. Las excepciones de denominador ocurren cuando el factor clínico necesita remover el paciente del denominador, y requieren una razón clara para la excepción en base a razones médicas, del paciente y del sistema. Cuando son aplicables, las excepciones explícitas son anotadas con razonamiento; la especificación precisa de las excepciones debería promover la facilidad para el uso en la futura conversión a medidas electrónicas. En casos en los cuales las herramientas de evaluación (por ej., herramientas de *screening* para síntomas conductuales y psicológicos de demencia [SCPD]) son requeridas para satisfacer la medida, se dan herramientas confiables y validadas de una manera no prescriptiva. Siempre que fuera posible, se hicieron esfuerzos para armonizar las medidas actualizadas con las existentes; los detalles sobre la armonización de medidas están incluidos en las especificaciones de medidas individuales.

La AAN y la APA actualizarán estas medidas continuamente cada 3 años, permitiendo que el grupo de mediciones aporte un marco de trabajo para la medición, más que un mandato a largo plazo.

**RESULTADOS** El grupo de mediciones actualizado toma en cuenta un subgrupo pequeño –pero importante– de prioridades inherentes al cuidado de alta calidad de la demencia. Los copresidentes y facilitadores revisaron 249 resúmenes, identificaron 23 guías para que sirvan de base de evidencia para las medidas. El grupo de trabajo clasificó 11 medidas candidatas para revisión en la reunión presencial donde, luego de revisar la evidencia y los vacíos en el cuidado, 9 medidas fueron finalizadas. El período de comentarios públicos resultó en más de 150 comentarios de 25 individuos u organizaciones. Cada medida es designada tanto para el propósito de mejora de calidad como de contabilidad. Cada medida apli-

**Tabla 1 Grupo actualizado de medidas del manejo de la demencia 2015**

| Título de la medida                                                                                       | Descripción de la medida                                                                                                                                                                                                                                                                                                                                                                                                                                                                                                                                                                                                             |
|-----------------------------------------------------------------------------------------------------------|--------------------------------------------------------------------------------------------------------------------------------------------------------------------------------------------------------------------------------------------------------------------------------------------------------------------------------------------------------------------------------------------------------------------------------------------------------------------------------------------------------------------------------------------------------------------------------------------------------------------------------------|
| <b>Revelación del diagnóstico de demencia<sup>a</sup></b>                                                 | Porcentaje de pacientes con un diagnóstico de trastorno o enfermedad demencial calificante cuyo diagnóstico les ha sido dado a ellos y, si estaba disponible, a su cuidador primario                                                                                                                                                                                                                                                                                                                                                                                                                                                 |
| <b>Educación y apoyo de los cuidadores para pacientes con demencia</b>                                    | Porcentaje de pacientes cuyos cuidadores fueron ofrecidos con educación sobre el manejo de la demencia y los cambios conductuales, y fueron referidos a recursos adicionales como apoyo en los últimos 12 meses                                                                                                                                                                                                                                                                                                                                                                                                                      |
| <b>Evaluación del estado funcional para pacientes con demencia</b>                                        | Porcentaje de pacientes con demencia para quienes se realizó una evaluación del estado funcional al menos una vez en los últimos 12 meses                                                                                                                                                                                                                                                                                                                                                                                                                                                                                            |
| <b>Screening y manejo de los síntomas conductuales y psiquiátricos asociados con la demencia (SCPD)</b>   | Porcentaje de pacientes con demencia para quienes había un <i>screening</i> documentado para síntomas conductuales y psiquiátricos, incluyendo depresión, y para quienes, si el <i>screening</i> era positivo, también había documentación de recomendaciones para el manejo en los últimos 12 meses                                                                                                                                                                                                                                                                                                                                 |
| <b>Screening para problemas de seguridad y seguimiento para pacientes con demencia</b>                    | Porcentaje de pacientes con demencia o sus cuidadores para quienes había un <i>screening</i> de seguridad documentado en 2 dominios de riesgo, peligroso para sí mismo o para terceros y riesgos ambientales, y para quienes, si el <i>screening</i> era positivo, había documentación que se les dio con recomendaciones para mejorar, que pueden incluir referirlos a otros recursos, en los últimos 12 meses                                                                                                                                                                                                                      |
| <b>Screening de la conducción y seguimiento para pacientes con demencia</b>                               | Porcentaje de pacientes con demencia para quienes había un <i>screening</i> documentado de riesgo de conducir y para quienes, si el <i>screening</i> era positivo, había también documentación de que habían sido informados sobre alternativas a la conducción en los últimos 12 meses                                                                                                                                                                                                                                                                                                                                              |
| <b>Planeamiento de cuidados avanzados y consejo sobre cuidados paliativos para pacientes con demencia</b> | Porcentaje de pacientes con demencia que tienen un plan de atención avanzada, o un representante documentado en el expediente médico o en la documentación del historial médico de que se discutió un plan de atención anticipada, pero el paciente no desea o no fue capaz de nombrar a un representante de la toma de decisiones, o proporcionar un plan de atención avanzada, y porcentaje de pacientes con demencia o su representante que recibieron asesoramiento integral sobre el manejo paliativo y de síntomas, y decisiones del final de la vida dentro de los 2 años desde el diagnóstico inicial o asunción de cuidados |
| <b>Evaluación del dolor y seguimiento para pacientes con demencia<sup>a</sup></b>                         | Porcentaje de pacientes con demencia que tuvieron un <i>screening</i> documentado para síntomas de dolor en cada visita y si el <i>screening</i> era positivo también tuvieron un plan de seguimiento documentado                                                                                                                                                                                                                                                                                                                                                                                                                    |
| <b>Tratamiento farmacológico de la demencia<sup>a</sup></b>                                               | Porcentaje de pacientes con demencia o sus cuidadores con quienes se discutieron las guías de opciones farmacológicas de tratamiento y de conductas no farmacológicas y modificaciones de la vida diaria, al menos una vez en los últimos 12 meses                                                                                                                                                                                                                                                                                                                                                                                   |

<sup>a</sup>Nueva medida agregada en 2015.

ca en los niveles del tratante individual (médico u otro profesional de la salud), de práctica y del sistema (hospital o cuidado de la salud), y es aplicable a pacientes ambulatorios, internados, del departamento de emergencia o del cuidado en urgencias, o en lugares de cuidado post-agudo. La tabla 1 incluye los títulos de las medidas y una breve descripción de cada una de las 9 medidas procesadas; las especificaciones completas de las medidas están disponibles en el apéndice e-1.

La revisión del grupo de trabajo resultó en decisiones para retirar o reconfigurar 3 medidas (tabla 2), para reafirmar 6 con modificaciones, y

para desarrollar y aprobar 3 nuevas medidas. El consenso apoyó el retiro de la medida de estadiar la demencia sobre la base de que las etapas de la demencia constituyen una medida artificial con poco significado intrínseco. El grupo de trabajo concluyó que hay valor en la evaluación continua de la progresión de la enfermedad, pero que a los pacientes y sus cuidadores les puede servir más oír si su demencia es leve, moderada o severa. Este algoritmo más cualitativo, que mantiene una especie de estadificación, es menos formal y tiene una validez que es fácil de entender, tanto para el clínico como para el cuidador. La evaluación funcional es retenida en el nuevo grupo de medidas. Las medidas de *screening* de depresión y el manejo de síntomas neuropsiquiátricos fueron reemplazadas por una sola medida actualizada que involucra el *screening* y manejo de los SCPD.

Seis medidas fueron conservadas con modificaciones. Por ejemplo, en la medida de seguridad para conducir, la excepción para pacientes con demencia que ya han dejado de conducir fue removida en respuesta a reportes que la excepción había causado confusión en los programas de reportes pagos. En la medida de educación del cuidador, se crearon nuevas excepciones para pacientes sin cuidadores, cuidadores con entrenamiento previo o certificación, y parejas de paciente/cuidador ya conectados con apoyos existentes. Para la medida de estado funcional,

**Tabla 2 Medidas de la calidad del manejo de la demencia 2009**

|                                                                                                                                       |
|---------------------------------------------------------------------------------------------------------------------------------------|
| Medida 1: Estado de la demencia (retirada en 2015)                                                                                    |
| Medida 2: Evaluación cognitiva (El <i>Physician Consortium for Performance Improvement</i> mantiene la administración de esta medida) |
| Medida 3: Evaluación del estado funcional                                                                                             |
| Medida 4: Evaluación de síntomas neuropsiquiátricos                                                                                   |
| Medida 5: Manejo de síntomas neuropsiquiátricos (retirada en 2015)                                                                    |
| Medida 6: <i>Screening</i> para síntomas de depresión (retirada en 2015)                                                              |
| Medidas sobre seguridad                                                                                                               |
| Medida 7: Consejos en relación con la seguridad                                                                                       |
| Medida 8: Consejos en relación con los riesgos de conducir                                                                            |
| Medidas sobre la subutilización de las estrategias del cuidado centrado en el paciente                                                |
| Medida 9: Consejos sobre cuidados paliativos y planeamiento del cuidado avanzado                                                      |
| Medidas 10: Educación y apoyo a los cuidadores                                                                                        |



se sumó algo de claridad adicional sobre cómo alcanzar los requerimientos de evaluación. La medida de seguridad fue modificada para especificar los dominios de riesgo dual relacionados a sí mismo/terceros o el ambiente. Las medidas previamente separadas para evaluación y manejo de los síntomas neuropsiquiátricos fueron unificadas en una medida única dedicada a la evaluación y manejo de los SCPD; esta medida también incorporó la medida previa de *screening* de depresión.

Finalmente, se desarrollaron 3 nuevas medidas. La primera involucra la revelación del diagnóstico de demencia, tanto para el síndrome demencial como para el trastorno demencial etiológico más probable. La segunda se enfoca en la evaluación de la población vulnerable de pacientes con demencia con dolor. La tercera es una medida para el tratamiento, enfatizada en el tratamiento farmacológico, cuando es apropiado, dentro de todos los rubros de tratamiento, incorporando modificaciones de comportamiento y de estilo de vida. Esta medida engloba estrategias de tratamiento farmacológico y no farmacológico porque la *Food and Drug Administration* – aprobó tratamientos farmacológicos solamente para un subgrupo selecto de demencias, e incluso estos son más modificadores de los síntomas que de la enfermedad.

El grupo de trabajo discutió, pero optó por no desarrollar, varias medidas o componentes de medidas. Un *screening* adicional para abuso y violencia en ancianos fue considerado como un componente potencial de la medida de seguridad, pero finalmente se determinó que esto no le concierne a la medida de seguridad y es un duplicado de las medidas existentes. El grupo de trabajo alienta a los proveedores y tratantes utilizar la medida existente de *screening* de maltrato al anciano y seguimiento para estos temas.<sup>22</sup> El grupo de trabajo también elige no desarrollar una medida para tratar el tema de caídas, marcha o movilidad por la probabilidad de duplicación de las medidas existentes. Las medidas de múltiples caídas están disponibles en individuos interesados en monitorear el desempeño en caídas, incluyendo medidas incluidas en NQF.<sup>23</sup>

Varias medidas de resultado potenciales fueron discutidas para su posible desarrollo e inclusión en el grupo final de medidas. El grupo de trabajo consideró varias medidas de resultado intermedias (proporción de pacientes identificados como conductores de riesgo que dejaron de conducir, proporción de pacientes para quienes se desarrollaron planes de cuidado avanzado, proporción de pacientes sin fármacos anticolinérgicos). Finalmente, se concluyó que la naturaleza inexorablemente neurodegenerativa y terminal de la demencia y las enfermedades que la causan, hace que las medidas de resultado rigurosas con

un ajuste de riesgo apropiado sean muy difíciles. Varias de las medidas se concibieron como medidas de proceso (por ej., estado funcional, evaluación de SCPD) incluidas de forma similar en el *Dementia Outcomes Set* utilizando las herramientas de medida del *Patient-Reported Outcome* publicadas por el *International Consortium for Health Outcomes Measurement*.<sup>24</sup>

Como se aclaró, esta actualización se enfoca en el manejo de la demencia y los denominados trastornos neurocognitivos mayores en el DSM-5. Como resultado, el grupo de mediciones no aplica a individuos diagnosticados con DCL, delirium, trastornos amnésicos, trastornos amnésicos persistentes inducidos por alcohol, síndrome post concusión, encefalopatía, pérdida de memoria, alteración de la conciencia y otros trastornos mentales persistentes no especificados. El grupo completo de enfermedades que causan demencia a las cuales la actualización sí aplica se encuentra en el apéndice e-1 del documento del grupo de mediciones.

**DISCUSIÓN** El objetivo de las medidas de calidad es guiar a sus usuarios a una mejoría en el cuidado basada en la evidencia y, eventualmente, en los resultados del cuidado de la salud. Las medidas descritas aquí ofrecen un espectro amplio de procesos necesarios para mejorar el cuidado de los pacientes con demencia. El grupo de trabajo espera que la implementación de estas medidas lleve a mejorías medibles en el cuidado de esta población tan vulnerable. Al momento, no hay medicaciones modificadoras de enfermedad para ninguna de las enfermedades que causan demencia, por lo que muchos de los principios sobre los cuales se basa el cuidado de los pacientes con demencia se enfocan en aspectos no farmacológicos. Las medidas son inusuales para el grado de énfasis que conceden a los cuidadores, frecuentemente conceptualizando la dupla paciente/cuidador como la unidad de tratamiento. Este enfoque es novedoso y relativamente poco común en medidas de calidad. El foco en la comunicación representa otro cambio importante hacia un concepto de cuidado más holístico con relación a lo que es más común actualmente en la mayoría de las medidas de calidad, aunque sin embargo es esencial para el buen cuidado de los pacientes con demencia.

Los clínicos también deberían ser conscientes de tener expectativas de desempeño razonables: no hay expectativas de que ningún proveedor logre una satisfacción instantánea del 100% de ninguna, y menos todavía de todas, las medidas. Tales expectativas pierden el foco de que las medidas de calidad son solo el primer paso en la mejoría de la calidad. Tomarse el tiempo de evaluar y reportar el propio desempeño es un primer paso crucial; los proveedores no deberían temer

recibir una llamada de atención si no alcanzan a completar el 100% del grupo de medidas. Solo midiendo el desempeño propio puede uno darse cuenta de las áreas que necesitan ser mejoradas y luego iniciar los cambios necesarios para conseguir un mejor cuidado. Los clínicos deberían implementar estas medidas antes de los mandatos pagos, como el MIPS, para asegurarse que estén listos y que se está ofreciendo el cuidado de mayor calidad.

Hay varias limitaciones asociadas a esta actualización que sirven para orientar a futuros grupos de trabajo. Primero, dados los cambios anticipados en el cuidado de la demencia, será importante considerar para futuros grupos de trabajo el aumento de la participación de trabajadores sociales, clínicos de emergencia y grupos específicos de enfermedad. En segundo lugar, un futuro enfoque será el desarrollo de medidas de resultado, con los esquemas auxiliares necesarios para el ajuste de riesgo. Tercero, las medidas para organizar la coordinación del cuidado –especialmente lo que se relaciona con las transiciones entre niveles de cuidado– garantizan una futura atención si las medidas de corte transversal en esta área prueban ser insuficientes. Finalmente, actualizaciones futuras revisarán las medidas previamente propuestas según su relevancia en un escenario que cambia constantemente.

Esta actualización representa el estado actual de la evidencia. Dado el aumento en los fondos y la investigación, se espera que el cuidado de pacientes con demencia evolucione rápidamente en los próximos años. El grupo de trabajo reconoce que el cuidado de calidad para pacientes con demencia es con frecuencia todavía conducido en un ambiente precario e inadecuado como el hogar, con transiciones riesgosas entre los niveles de cuidado, además de muchos otros desafíos no limitados a los modelos de cuidado que favorecen procedimientos sobre el llamado cuidado cognitivo, sistemas de apoyo social inadecuados y la viabilidad a largo plazo de Medicare. La AAN y la APA continuarán revisando el grupo de medidas según sea necesario para involucrar áreas en las cuales puede y debe haber mejoría. Los clínicos deberían permanecer atentos para asegurarse que el cuidado otorgado sea de máxima calidad.

### CONTRIBUCIONES DE LOS AUTORES

Dr. Sanders contribuyó al concepto y diseño del estudio, adquisición de datos, análisis y/o interpretación de datos, borrador/revisión del manuscrito, revisiones críticas del manuscrito para contenido intelectual importante, y supervisión del estudio incluyendo la responsabilidad de conducir la investigación y aprobación final. Dr. Nininger contribuyó al concepto y diseño del estudio, adquisición de datos, análisis y/o interpretación de datos, revisiones críticas del manuscrito para contenido intelectual importante, y supervisión del estudio incluyendo la responsabilidad de conducir la investigación y aprobación final. Dr. Absher contribuyó al concepto y diseño del estudio, adquisición de

datos, análisis y/o interpretación de datos, revisiones críticas del manuscrito para contenido intelectual importante, y supervisión del estudio incluyendo la responsabilidad de conducir la investigación y aprobación final. A. Bennett contribuyó al concepto y diseño del estudio, adquisición de datos, análisis y/o interpretación de datos, borrador/revisión del manuscrito, revisiones críticas del manuscrito para contenido intelectual importante, y supervisión del estudio incluyendo la responsabilidad de conducir la investigación y aprobación final. S. Shugarman contribuyó al concepto y diseño del estudio, adquisición de datos, análisis y/o interpretación de datos, borrador/revisión del manuscrito, revisiones críticas del manuscrito para contenido intelectual importante, y supervisión del estudio incluyendo la responsabilidad de conducir la investigación y aprobación final. Dr. Roca contribuyó al concepto y diseño del estudio, adquisición de datos, análisis y/o interpretación de datos, borrador/revisión del manuscrito, revisiones críticas del manuscrito para contenido intelectual importante, y supervisión del estudio incluyendo la responsabilidad de conducir la investigación y aprobación final.

### RECONOCIMIENTOS

Los autores agradecen a todos los miembros del *Dementia Management Update Quality Measurement Set Work Group* por su dedicación, tiempo, energía, contribuciones y trabajo que apoyó el desarrollo de este manuscrito: Amy E. Sanders, MD, MS, FAAN (American Academy of Neurology); Robert Roca, MD (American Psychiatric Association); Piero Antuono, MD (American Academy of Neurology); Kelly Sullivan, PhD (American Academy of Neurology); Karl Goodkin, MD, PhD, DFAPA (American Psychiatric Association); Donovan Maust, MD, MS (American Psychiatric Association); Michael Lubin, MD, MACP (American College of Physicians); Sam Fazio, PhD (Alzheimer's Association); Ann Knutson (Alzheimer's Association); Robert O'Keefe, MA (Alzheimer's Association); Eric Tangalos, MD, FACP, AGSF, CMD (AMDA–The Society for Post-Acute and Long-Term Care Medicine); Glenn Smith, PhD (American Academy of Clinical Neuropsychology and American Psychological Association); Brian Unwin, MD, FFAFP (American Academy of Family Physicians); Joseph Shega, MD (American Academy of Hospice and Palliative Medicine); Dale Strasser, MD (American Academy of Physical Medicine and Rehabilitation); Michele Grigaitis, DNP, FNP-BC, CNRN (American Association of Neuroscience Nurses); Jerry Johnson, MD (American Geriatric Society); Mary Kathleen Owens, RN MSN, C-NE, RAC-CT (American Health Care Association and Gerontological Advanced Practice Nurses Association); Catherine Piersol, PhD, OTR, FAOTA (American Occupational Therapy Association); Lise McCarthy, PT, DPT, GCS (American Physical Therapy Association); Kathleen Welsh-Bohmer, PhD, ABPP (American Psychological Association); David Webster, MD, MBA (Humana); James Galvin, MD, MPH, FANA (Lewy Body Dementia Association); Daniel Marson, PhD, JD (National Academy of Neuropsychology); Richard Fortinsky, PhD (The Gerontological Society of America); Marsden McGuire, MD (Veteran's Affairs); John Absher, MD (American Academy of Neurology Facilitator); James Nininger, MD (American Psychiatric Association Facilitator); Amy Bennett, JD (American Academy of Neurology Staff); Gina Gjorvad (American Academy of Neurology Staff); Erin Hagen (American Academy of Neurology Staff); Becky Schierman, MPH (American Academy of Neurology Staff); Samantha Shugarman, MS (American Psychiatric Association Staff); and Kristin Kroeger (American Psychiatric Association Staff). Los autores también le agradecen a Jean O'Keefe por la participación y los individuos y organizaciones que ofrecieron comentarios públicos.

### FONDOS PARA EL ESTUDIO

No se reportan fondos.

## DECLARACIÓN DE INTERESES

A. Sanders es el Site PI en Upstate para el TCAD/Noble clinical trial, esponsorado por el Alzheimer's Disease Cooperative Study y Toyama Chemical Company, Ltd. J. Ninger no tiene nada para declarar relevante al manuscrito. J. Absher es miembro del South Carolina Alzheimer's Association Board of Directors. A. Bennett, S. Shugarman y R. Rocano no tienen nada relevante para declarar al manuscrito. Ir a [Neurology.org](#) para declaraciones completas.

Recibido el 28 de julio de 2016. Aceptado en su formato final el 17 de febrero de 2017.

## BIBLIOGRAFÍA

1. Zeilig H. Dementia as a cultural metaphor. *Gerontologist* 2014;54:258–267.
2. Satizabal CL, Beiser AS, Chouraki V, et al. Incidence of dementia over three decades in the Framingham heart study. *N Engl J Med* 2016;374:523–532.
3. Alzheimer's Association. Alzheimer's Research Funding on Path for Additional \$400 Million Increase. 2016. Available at: [alz.org/news\\_and\\_events\\_alz\\_funding\\_on\\_path\\_for\\_additional\\_400\\_million.asp](http://alz.org/news_and_events_alz_funding_on_path_for_additional_400_million.asp). Accessed July 21, 2016.
4. Mitchell SL, Teno JM, Kiely DK, et al. The clinical course of advanced dementia. *N Engl J Med* 2009;361:1529–1538.
5. Lonroos E, Kyronen P, Bell JS, et al. Risk of death among persons with Alzheimer's disease: a national register-based nested case-control study. *J Alzheimers Dis* 2013;33:157–164.
6. Alzheimer's Association. 2015 Alzheimer's disease facts and figures. *Alzheimers Dement* 2015;11:332–384.
7. Hurd MD, Martorell P, Langa KM. Monetary costs of dementia in the United States. *N Engl J Med* 2013;369:489–490.
8. Kamiya M, Sakurai T, Ogama N, et al. Factors associated with increased caregivers' burden in several cognitive stages of Alzheimer's disease. *Geriatr Gerontol Int* 2014;14:45–55.
9. Advisory Council on Alzheimer's Research, Care, and Services. Advisory Council January Meeting Presentation: Dementia Care and Research Summit. 2016. Available at: [aspe.hhs.gov/advisory-council-january-2016-meeting-presentation-dementia-care-and-research-summit](http://aspe.hhs.gov/advisory-council-january-2016-meeting-presentation-dementia-care-and-research-summit). Accessed April 8, 2016.
10. Odenheimer G, Borson S, Sanders AE, et al. Quality improvement in neurology: dementia management quality measures. *Neurology* 2013;81:1545–1549.
11. National Quality Forum. Neurological Conditions 2015–2016. Final Report. 2016. Available at: [qualityforum.org/Publications/2016/11/Neurological\\_Conditions\\_2015-2016.aspx](http://qualityforum.org/Publications/2016/11/Neurological_Conditions_2015-2016.aspx). Accessed January 3, 2017.
12. Llanque S, Savage L, Rosenberg N, et al. Concept analysis: Alzheimer's caregiver stress. *Nurs Forum* 2016;51:21–31.
13. Black BS, Johnston D, Rabins PV, et al. Unmet needs of community-residing persons with dementia and Their informal caregivers: findings from the MIND at home study. *J Am Geriatr Soc* 2013;61:2087–2095.
14. Troeung L, Gasson N, Egan S. Patterns and predictors of mental health services utilization in people with Parkinson's disease. *J Geriatr Psychiatry Neurol* 2015;28:12–18.
15. Sivathanan S, Pyat JH, McGrail KM. Variations in self-reported practice of physicians providing clinical care to individuals with dementia: a systematic review. *J Am Geriatr Soc* 2013;61:1277–1285.
16. Iverson DJ, Gronseth GS, Reger MA, et al. Practice parameter update: evaluation and management of driving risk in dementia: report of the Quality Standards Subcommittee of the American Academy of Neurology. *Neurology* 2010;74:1316–1324.
17. American Geriatrics Society. Clinician's Guide to Assessing and Counseling Older Drivers. 3rd ed. Washington: National Highway Traffic Safety Administration; 2016. Report No. DOT HS 812 228.
18. Pollack KM, Morhaim D, Williams M. The public's perspectives on advance directives in Maryland: implications for state legislative and regulatory policy. *Health Policy* 2010;96:57–63.
19. Gozalo P, Teno JM, Mitchell SL, et al. End-of-Life transitions among nursing home residents with cognitive issues. *N Engl J Med* 2011;365:1212–1221.
20. Gibson SJ, Lussier D. Prevalence and relevance of pain in older persons. *Pain Med* 2012;13:SS23–S26.
21. Quality and Safety Subcommittee. American Academy of Neurology Quality Measurement Manual 2014 Update. 2015. Available at: [aan.com/uploadedFiles/Website\\_Library\\_Assets/Documents/3.Practice\\_Management/2.Quality\\_Improvement/1.Quality\\_Measures/2.About\\_Quality\\_Measures/2015%2002%2011%20Process%20Manual%20Final.pdf](http://aan.com/uploadedFiles/Website_Library_Assets/Documents/3.Practice_Management/2.Quality_Improvement/1.Quality_Measures/2.About_Quality_Measures/2015%2002%2011%20Process%20Manual%20Final.pdf). Accessed July 21, 2016.
22. Centers for Medicare and Medicaid Services (CMS). Elder Maltreatment Quality Measurement Initiative. Center of Clinical Standards and Quality. Available at: [nationalacademies.org/hmd;/media/AAF246B976704A94A3A8C521DF807F6C.ashx](http://nationalacademies.org/hmd;/media/AAF246B976704A94A3A8C521DF807F6C.ashx). Accessed July 21, 2016.
23. National Quality Forum. Quality Position System. Available at: <https://www.qualityforum.org/QPS/QPSTool.aspx>. Accessed May 25, 2016.
24. International Consortium for Healthcare Outcomes Measurement (ICHOM). ICHOM Standard Set for Dementia. Available at: [ichom.org/medical-conditions/dementia/](http://ichom.org/medical-conditions/dementia/). Accessed July 21, 2016.
